# Supplementary material
Source: PubMed Central journal article supplement (PMC2862308)
Supplement: NIHMS196226-supplement-01.pdf [file NIHMS196226-supplement-01.pdf]

**Supplemental Table:**

**Integrated Discrimination Improvement of the various model comparisons in men, women and overall sample**

| <b>Model</b>                                      | <b>Overall</b>              | <b>Men</b>                  | <b>Women</b>                  |
|---------------------------------------------------|-----------------------------|-----------------------------|-------------------------------|
| <b>TRF vs. TRF+CIMT</b>                           | <b>0.007 (0.004, 0.010)</b> | <b>0.010 (0.006, 0.016)</b> | <b>0.002 (0.001, 0.006)</b>   |
| <b>TRF vs. TRF +<br/>plaque</b>                   | <b>0.008 (0.005, 0.012)</b> | <b>0.008 (0.004, 0.013)</b> | <b>0.009 (0.005, 0.015)</b>   |
| <b>TRF vs.<br/>TRF+CIMT+ plaque</b>               | <b>0.011 (0.008, 0.015)</b> | <b>0.013 (0.008, 0.020)</b> | <b>0.009 (0.005, 0.015)</b>   |
| <b>TRF +CIMT vs.<br/>TRF +CIMT+<br/>plaque</b>    | <b>0.004 (0.002, 0.007)</b> | <b>0.003 (0.001, 0.006)</b> | <b>0.007 (0.003, 0.012)</b>   |
| <b>TRF + plaque vs.<br/>TRF +CIMT+<br/>plaque</b> | <b>0.003 (0.001, 0.005)</b> | <b>0.005 (0.002, 0.009)</b> | <b>-0.000 (-0.001, 0.001)</b> |
